# Supplementary material for: Facile control of the surface property and hydrolytic degradation of poly(l-lactide) materials by coating poly(l-lactide)-based triblock copolymers with hydrophilic or hydrophobic block
Source: Royal Society of Chemistry journal article supplement (doi:10.1039/d2ma00417h), 2022-01-01
Supplement: d2ma00417h1.pdf [file d2ma00417h1.pdf]

## Supplementary Information

# Facile Control of Surface Property and Hydrolytic Degradation of Poly(L-lactide) Materials by Coating Poly(L-lactide)-Based Triblock Copolymers with Hydrophilic or Hydrophobic Block

*Hideto Tsuji,\* Narumi Tsukamoto, and Yuki Arakawa*

*Department of Applied Chemistry and Life Science, Graduate School of Engineering,  
Toyohashi University of Technology, Tempaku-cho, Toyohashi, Aichi 441-8580, Japan*

*E-mail: [ht003@edu.tut.ac.jp](mailto:ht003@edu.tut.ac.jp)*

### Contents

- S1. GPC charts of PB diol, PLLA-PB-PLLA, PEG, and PLLA-PEG-PLLA (Figure S1)**
- S2. DSC thermograms of PLLA films before and after coating (Figure S2)**
- S3. Thermal properties of PLLA films before and after coating (Table S1)**

**S1. GPC charts of PB diol, PLLA-PB-PLLA, PEG, and PLLA-PEG-PLLA (Figure S1)**

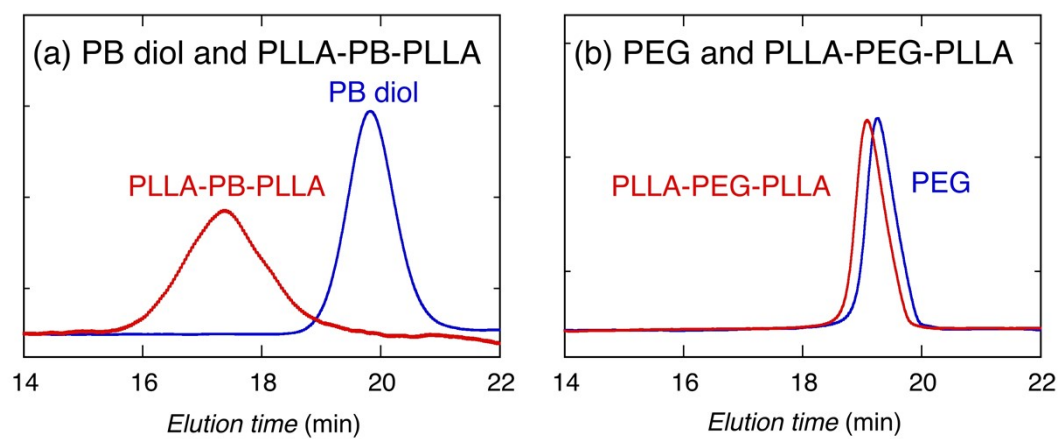

**Figure S1.** GPC charts of PB diol, PLLA-PB-PLLA (a) and PEG, PLLA-PEG-PLLA (b).

**S2. DSC thermograms of PLLA films before and after coating (Figure S2)**

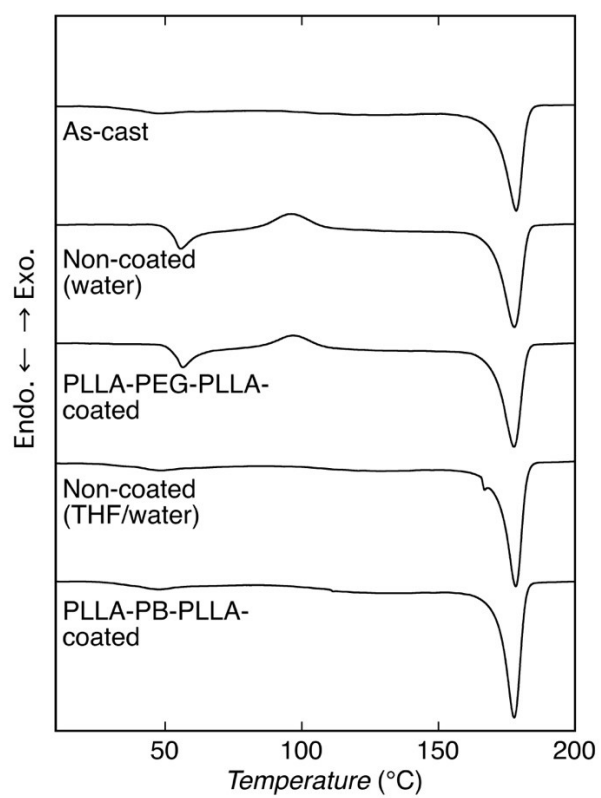

**Figure S2.** DSC thermograms of PLLA films before and after coating.

### S3. Thermal properties of PLLA films before and after coating (Table S1)

**Table S1.** Thermal properties of PLLA films before and after coating.

| Treatment              | $T_{cc}^a$<br>(°C) | $T_m^a$<br>(°C) | $\Delta H_{cc}^b$<br>(J g <sup>-1</sup> ) | $\Delta H_m^b$<br>(J g <sup>-1</sup> ) | $\Delta H(\text{tot})^c$<br>(J g <sup>-1</sup> ) |
|------------------------|--------------------|-----------------|-------------------------------------------|----------------------------------------|--------------------------------------------------|
| As-cast                |                    | 178.5           |                                           | 30.5                                   | 30.5                                             |
| Non-coated (water)     | 96.2               | 177.8           | -8.5                                      | 38.0                                   | 29.5                                             |
| PLLA-PEG-PLLA-coated   | 96.7               | 177.7           | -7.4                                      | 38.1                                   | 30.7                                             |
| Non-coated (THF/water) | 135.4              | 178.3           |                                           | 32.6                                   | 32.6                                             |
| PLLA-PB-PLLA-coated    |                    | 177.7           |                                           | 32.9                                   | 32.9                                             |

<sup>a)</sup>  $T_{cc}$  and  $T_m$  are cold crystallization and melting temperatures, respectively.

<sup>b)</sup>  $\Delta H_{cc}$  and  $\Delta H_m$  cold crystallization and melting enthalpies, respectively.

<sup>c)</sup>  $\Delta H(\text{tot}) = \Delta H_{cc} + \Delta H_m$ .
